# Supplementary material for: Riboflavin Intake Inversely Associated with Cardiovascular-Disease Mortality and Interacting with Folate Intake: Findings from the National Health and Nutrition Examination Survey (NHANES) 2005–2016
Source: MDPI journal article supplement (doi:10.3390/nu14245345), 2022-12-16
Supplement: s1 [file s1]

**Supplementary Table S1.** Joint effect of riboflavin intake and folate intake in relation to CVD mortality and all-cause mortality.

| Study Outcomes             |                   | Both Genders      |                 | Men               |                 | Women             |                 |
|----------------------------|-------------------|-------------------|-----------------|-------------------|-----------------|-------------------|-----------------|
|                            |                   | HR (95% CI)       | <i>p</i> -value | HR (95% CI)       | <i>p</i> -value | HR (95% CI)       | <i>p</i> -value |
| <b>All-cause mortality</b> |                   |                   |                 |                   |                 |                   |                 |
| Low folate intake          | Riboflavin intake |                   |                 |                   |                 |                   |                 |
|                            | Q1                | 1.63 (1.22–2.18)  | 0.001           | 1.69 (1.10–2.59)  | 0.018           | 1.56 (1.08–2.26)  | 0.017           |
|                            | Q2                | 1.13 (0.85–1.51)  | 0.402           | 1.31 (0.89–1.93)  | 0.176           | 0.99 (0.70–1.38)  | 0.943           |
|                            | Q3                | 1.42 (1.06–1.90)  | 0.021           | 1.33 (0.87–2.04)  | 0.192           | 1.43 (0.99–2.07)  | 0.055           |
|                            | Q4                | 1.09 (0.75–1.57)  | 0.649           | 1.19 (0.78–1.81)  | 0.420           | 0.96 (0.49–1.90)  | 0.910           |
| High folate intake         | Riboflavin intake |                   |                 |                   |                 |                   |                 |
|                            | Q1                | 2.20 (1.27–3.82)  | 0.006           | 1.82 (0.84–3.96)  | 0.129           | 2.56 (1.13–5.83)  | 0.025           |
|                            | Q2                | 1.17 (0.84–1.62)  | 0.349           | 1.23 (0.71–2.12)  | 0.464           | 1.08 (0.73–1.61)  | 0.684           |
|                            | Q3                | 1.07 (0.86–1.33)  | 0.562           | 1.24 (0.95–1.62)  | 0.110           | 0.89 (0.58–1.39)  | 0.618           |
|                            | Q4                | 1.00              |                 | 1.00              |                 | 1.00              |                 |
| <b>CVD mortality</b>       |                   |                   |                 |                   |                 |                   |                 |
| Low folate intake          | Riboflavin intake |                   |                 |                   |                 |                   |                 |
|                            | Q1                | 1.74 (0.93–3.28)  | 0.083           | 1.53 (0.68–3.44)  | 0.297           | 2.29 (0.77–6.78)  | 0.135           |
|                            | Q2                | 1.59 (0.93–2.72)  | 0.089           | 1.97 (1.04–3.74)  | 0.038           | 1.67 (0.63–4.42)  | 0.298           |
|                            | Q3                | 1.78 (1.14–2.81)  | 0.013           | 1.38 (0.82–2.34)  | 0.223           | 2.96 (1.06–8.27)  | 0.039           |
|                            | Q4                | 1.14 (0.45–2.85)  | 0.784           | 1.18 (0.44–3.15)  | 0.743           | 1.41 (0.28–7.12)  | 0.672           |
| High folate intake         | Riboflavin intake |                   |                 |                   |                 |                   |                 |
|                            | Q1                | 4.38 (1.79–10.72) | 0.001           | 2.68 (0.67–10.67) | 0.160           | 8.73 (2.07–36.85) | 0.004           |
|                            | Q2                | 2.25 (1.21–4.19)  | 0.011           | 2.18 (0.89–5.33)  | 0.088           | 3.06 (1.14–8.21)  | 0.026           |
|                            | Q3                | 1.31 (0.89–1.93)  | 0.175           | 1.15 (0.70–1.89)  | 0.577           | 2.19 (1.14–4.19)  | 0.019           |
|                            | Q4                | 1.00              |                 | 1.00              |                 | 1.00              |                 |

CVD: cardiovascular diseases; Model adjusted for age, gender, race, physical activity, education, smoking, alcohol drinking, intake of energy and fat, metabolic syndrome, depression, and short sleep. Individuals with high intake of folate (quartile 3 and 4) and quartile 4 of riboflavin were used as the reference group. The number of individuals in each group was: high folate (Q1–Q4 of riboflavin, 295, 997, 1703, 2245); low folate (2327, 1622, 916, 375).
